# Supplementary material for: A New Fitness Test of Estimating VO2max in Well-Trained Rowing Athletes
Source: Front Physiol. 2021 Jul 2;12:701541. doi: 10.3389/fphys.2021.701541 (PMC8283806; doi:10.3389/fphys.2021.701541)
Supplement: Supplementary Table 1 — Submaximal FFT programs for both the ROW group and RUN group. [file Table_1.XLSX]

## Sheet: supplementary Tables
Supplementary table 1. Submaximal FFT protocols for both ROW group and RUN group.						Supplementary table 2. GXT protocols for both ROW group and RUN group.
Stage	1st	2nd	3rd	4th		Stage	1st	2nd	3rd	4th	5th	6th	7th
ROW						ROW
Stroke rate (spm)	16	18	20	22		Stroke rate (spm)	16	18	20	22	24	26	28
Duration (min)	3	3	3	3		Duration (min)	3	3	3	3	3	3	3
Lightweight (W, Male/Female)	160 / 120	200 / 160	240 / 200	280 / 240		Lightweight (W, Male/Female)	160 / 120	200 / 160	240 / 200	280 / 240	320 / 280	360 / 320	400 / 360
Heavyweight (W, Male/Female)	200 / 140	240 / 180	280 / 220	320 / 260		Heavyweight (W, Male/Female)	200 / 140	240 / 180	280 / 220	320 / 260	360 / 300	400 / 340	440 / 380
RUN						RUN
Speed (kmph, Male/Female)	9 / 8	11 / 10	13 / 12	15 / 14		Speed (kmph)	2.7	4	5.5	6.8	8	8.9	9.7
Grade (%)	0	0	0	0		Grade (%)	10	12	14	16	18	20	22
Duration (min)	3	3	3	3		Duration (min)	3	3	3	3	3	3	3
